# Supplementary material for: Synthesis of water-soluble fluorescent carbon dots from Setcreasea purpurea boom and its application for Br2 detection
Source: Royal Society of Chemistry journal article supplement (doi:10.1039/c7ay02631e), 2017-11-27
Supplement: c7ay02631e1.pdf [file c7ay02631e1.pdf]

## Supplementary Information

### Synthesis of water-soluble fluorescent carbon dots from *Setcreasea purpurea* boom and its application for Br<sub>2</sub> detection

Haoying Zhai<sup>a</sup>, Baozhan Zheng<sup>b</sup>, Feng Yang<sup>b</sup>, Meina Wang<sup>b</sup>, Dan Xiao<sup>b,c,\*</sup>

<sup>a</sup> College of Chemistry and Chemical Engineering, Neijiang Normal University, Neijiang, Sichuan 641112, China.

<sup>b</sup> College of Chemistry, Sichuan University, 29 Wangjiang Road, Chengdu 610064, China.

<sup>c</sup> College of Chemical Engineering, Sichuan University, 29 Wangjiang Road, Chengdu 610064, China.

\*Corresponding author:

E-mail: xiaodan@scu.edu.cn (Dan Xiao)

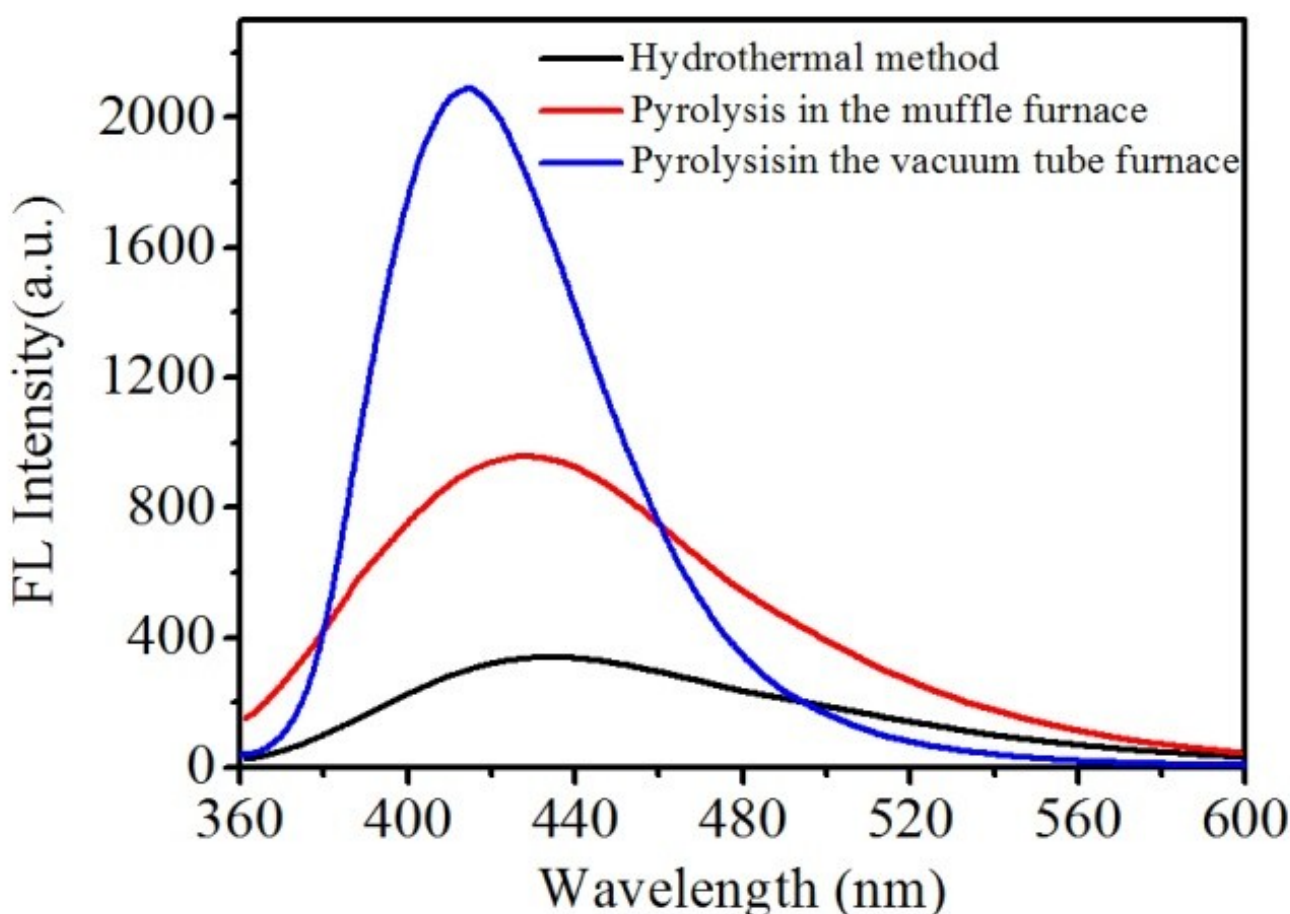

**Fig. S1** The fluorescent spectra of CDs prepared with different methods, including hydrothermal method (black line), pyrolysis in the muffle furnace (red line) and pyrolysis in the vacuum tube furnace (blue line).

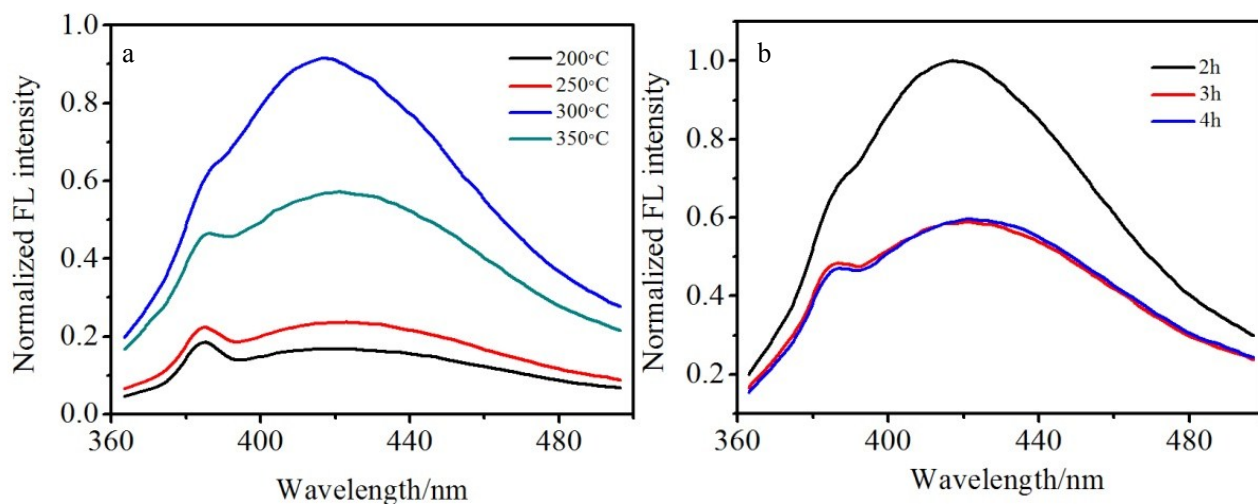

**Fig. S2** Fluorescence spectra of CDs prepared under different temperature (a) and reaction time (b).

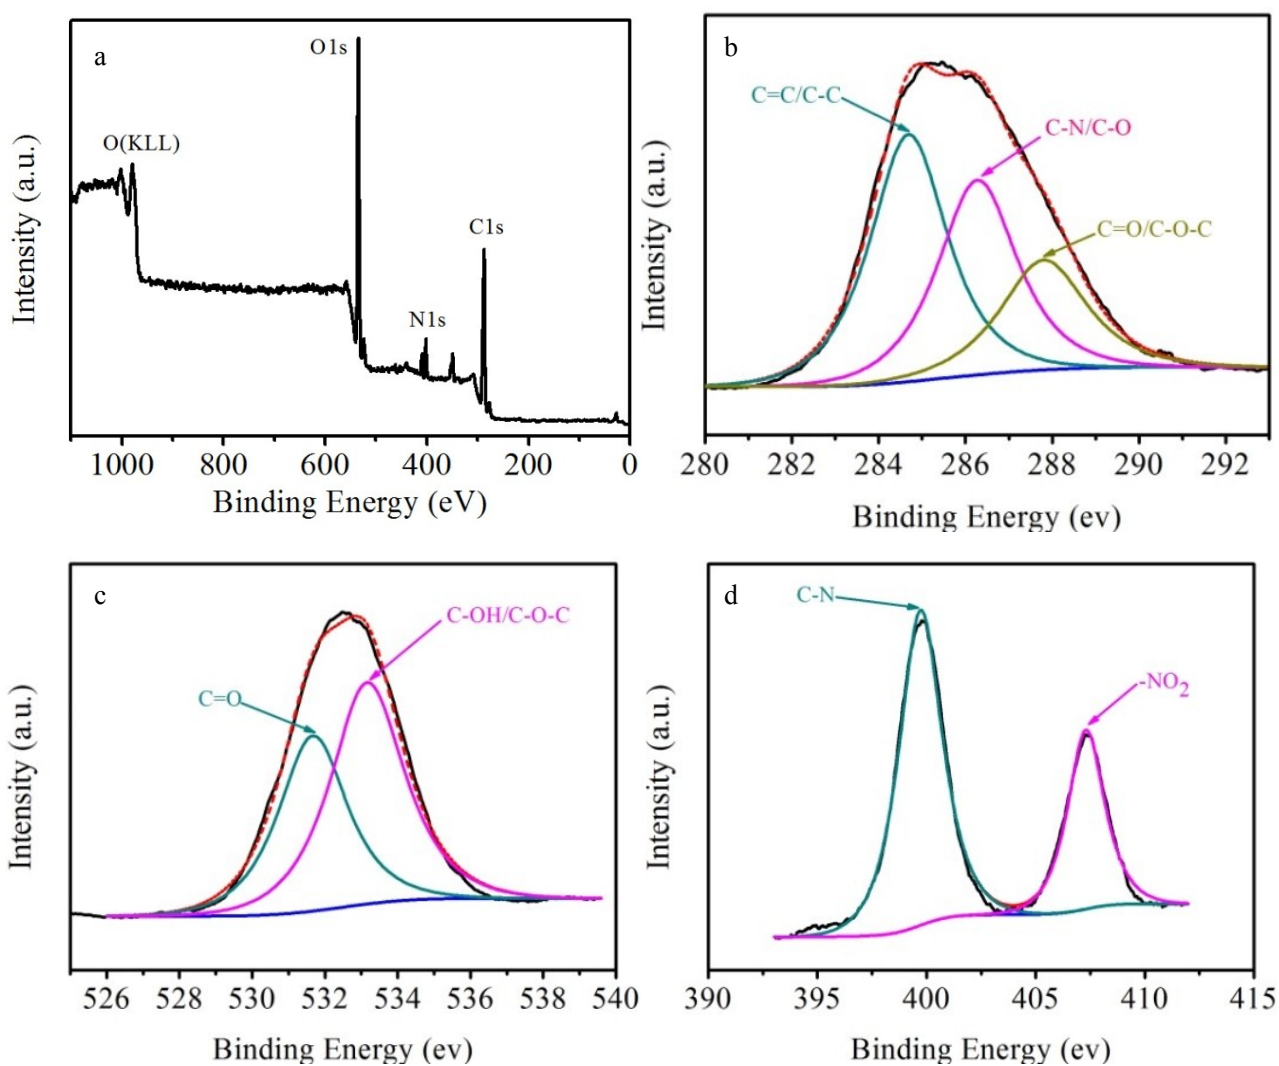

**Fig. S3** XPS spectra of CDs (a), C1s (b), O1s (c) and N1s spectra (d).

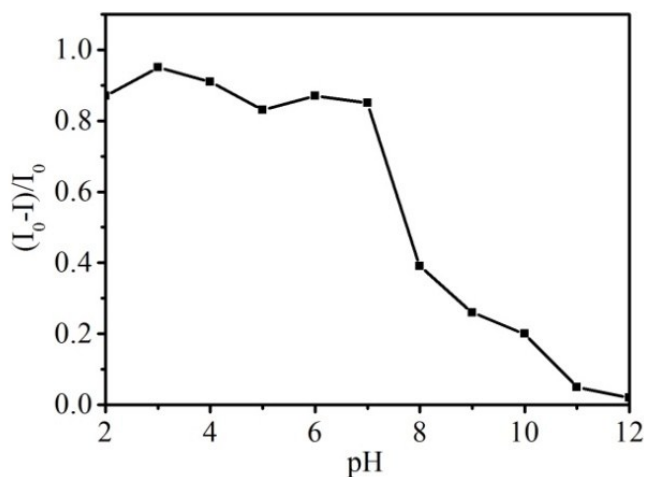

**Fig. S4** Effects of pH values on the fluorescence quenching efficiency of CDs.

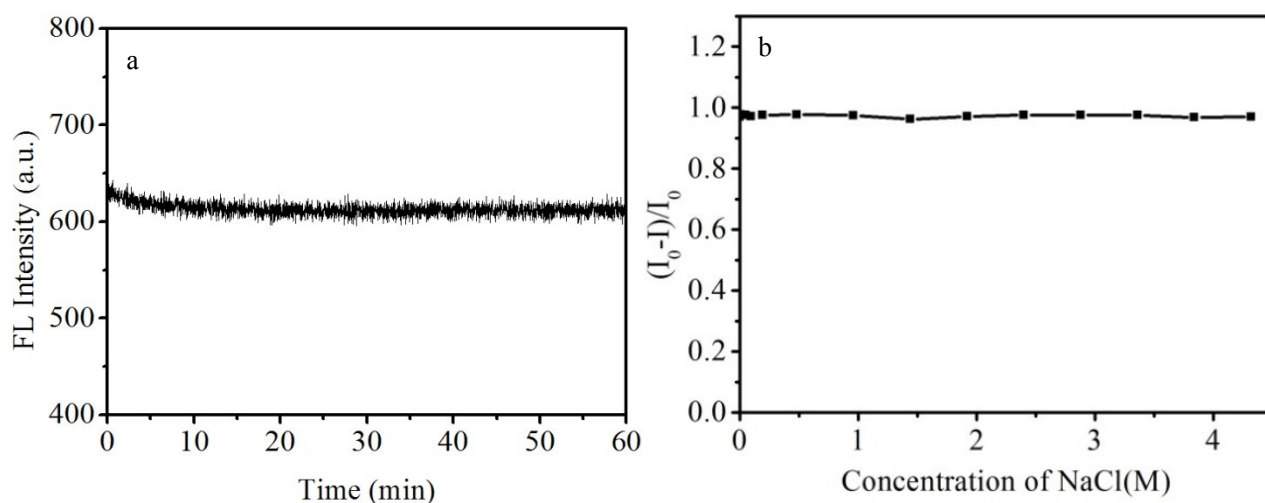

**Fig. S5** (a) Photostability of CDs under the irradiation of 340 nm; (b) stability in different ionic strengths of NaCl.

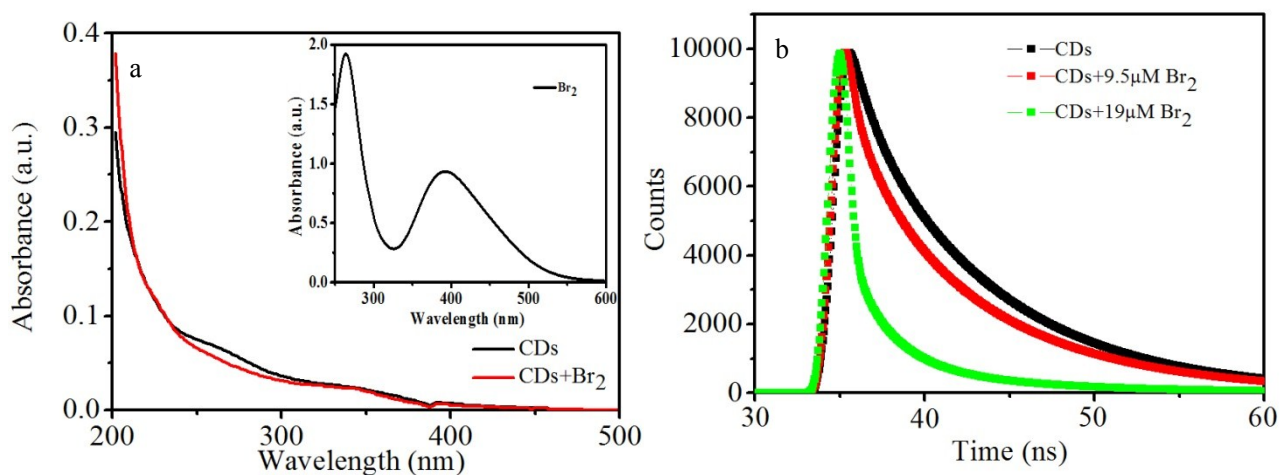

**Fig. S6** UV-vis absorption spectra (a) (The inset shows the ultraviolet absorption of  $\text{Br}_2$ ) and fluorescence lifetime (b) of CDs in the absence and presence of  $\text{Br}_2$ .
